# Supplementary material for: Contrasting epigenetic states of heterochromatin in the different types of mouse pluripotent stem cells
Source: PubMed Central journal article supplement (PMC5893598; doi:10.1038/s41598-018-23822-4), 2018-04-10
Supplement: 41598_2018_23822_MOESM1_ESM.pdf [file 41598_2018_23822_MOESM1_ESM.pdf]

## **Supplementary Figures and Tables**

### **Contrasting epigenetic states of heterochromatin in the different types of mouse pluripotent stem cells**

Tosolini Matteo, Brochard Vincent, Adenot Pierre, Chebrouit Martine, Grillo Giacomo, Navia Violette, Beaujean Nathalie, Francastel Claire, Bonnet-Garnier Amélie and Jouneau Alice

## Supplementary Figure legends

### Supplementary Fig. 1:

(A) Magnification of nuclei of 2i-ESCs, serum-ESCs and EpiSCs, representative of the categories described in Fig. 1B. (B) Mean number of H3K9me3, H3K27me3 and DAPI clusters in each category and each type of pluripotent cells.

### Supplementary Fig.2

RNA-FISH for Major satellites in ESCs: examples of nuclei showing localization of RNA foci near chromocenter (A), within peri-nuclear heterochromatin (B) or peri-nucleolar heterochromatin (C). DAPI is in red, major satellite probe is in green.

### Supplementary Fig. 3:

(A) Pictures of EpiSCs converted from WT or Suv39hdn ESCs. (B) Relative expression of different common pluripotency (*Oct4*, *Sox2*, *Nanog*), naive-specific (*Klf4*, *Esrrb*) and epiblast specific (*Dnmt3b*, *Fgf5*, *Otx2*) transcripts by qRT-PCR analysis normalized to *Sdha* and *Pbgd* housekeeping genes. 2i-ESC expression was set to 1. Three independent conversions were made. (C) Western-blot analysis of EZH2, H3K27me3 and H3K9me3 and H3 as loading control, in WT and Suv39hdn cells. (D) Immunostaining images (single plan) for H3K9me3, H3K27me3 and DAPI in WT 2i-ESCs and WT cEpiSCs. (E) Representative nuclei of the categories as in Fig. 1B and percentages of each in the WT 2i-ESC (WT01 line) and cEpiSC populations. (F) ChIP-QPCR analysis of H3K9me3 and H3K27me3 at major satellites in WT and *Suv39hdn* 2i-ESCs and cEpiSCs (n=4; error bars are s.e.m). Values were normalized to input and shown relative to WT 2i-ESCs.

### Supplementary Fig. 4:

(A) Pictures of ESCs and cEpiSCs obtained after 10 days of conversion. (B) Relative expression of different common pluripotency (*Oct4*, *Sox2*, *Nanog*), naive-specific (*Klf4*, *Esrrb*) and epiblast specific (*Fgf5*, *Otx2*) transcripts by qRT-PCR analysis normalized to *Sdha* and *Pbgd* housekeeping genes. 2i-ESC expression was set to 1. Two independent conversions were made. (C) Percentages of each category of nuclei for WT-ESCs and WT cEpiSCs.

### Supplementary Fig. 5

Immunostaining images of NANOG in the 3 pluripotent cell types.

**Supplementary Table S1: List of antibodies used for immunostaining and western-blot**

**Supplementary Table S2: list of primers used for qRT-PCR**

A

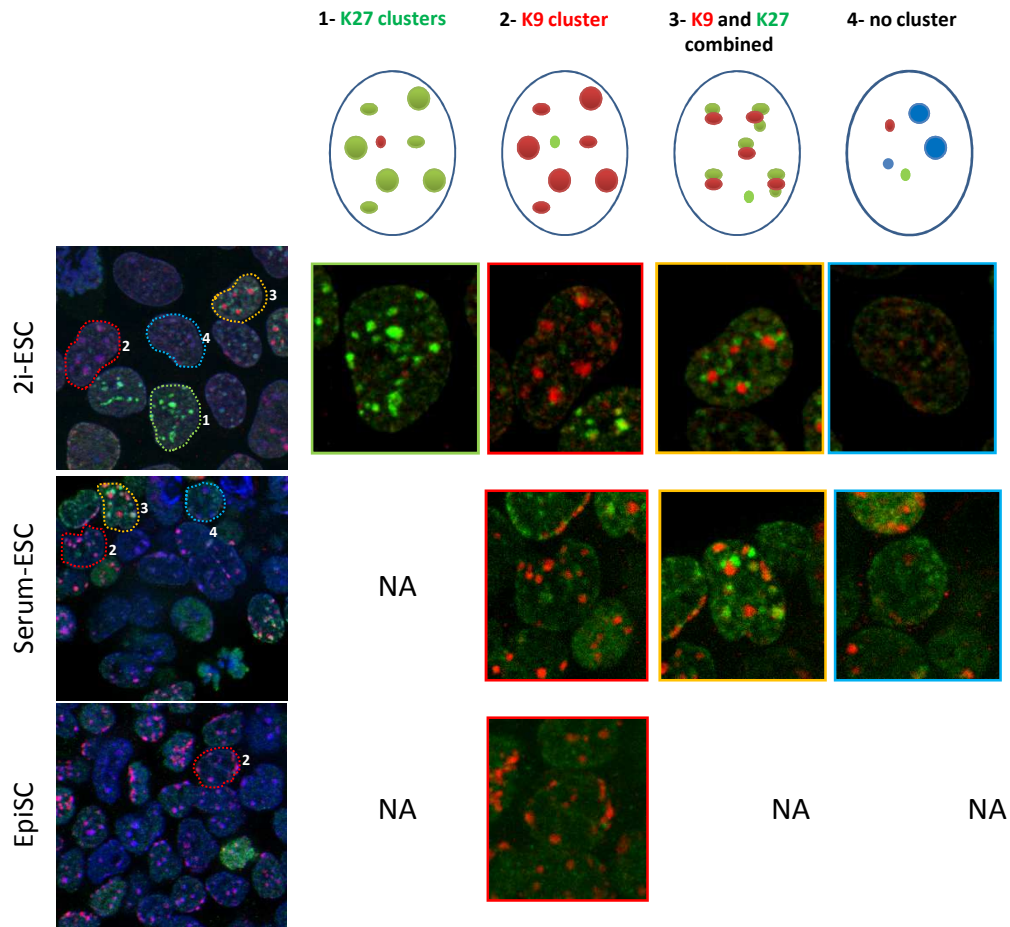

B

| Mean number of clusters/ categories | Cat. 1    | Cat. 2    | Cat. 3    | Cat. 4    |
|-------------------------------------|-----------|-----------|-----------|-----------|
| <b>2i-ESC (n=75)</b>                |           |           |           |           |
| <b>DAPI</b>                         | <b>17</b> | <b>14</b> | <b>11</b> | <b>15</b> |
| K9me3                               | 2         | 11        | 9         | 2         |
| K27me3                              | 17        | 2         | 9         | 1         |
| <b>serum ESC (n=40)</b>             |           |           |           |           |
| <b>DAPI</b>                         | <b>NA</b> | <b>16</b> | <b>16</b> | <b>7</b>  |
| K9me3                               | NA        | 18        | 13        | 2         |
| K27me3                              | NA        | 1         | 7         | 1         |
| <b>EpiSC (n=30)</b>                 |           |           |           |           |
| <b>DAPI</b>                         | <b>NA</b> | <b>15</b> | <b>NA</b> | <b>NA</b> |
| K9me3                               | NA        | 15        | NA        | NA        |
| K27me3                              | NA        | 0         | NA        | NA        |

Supp Figure 1

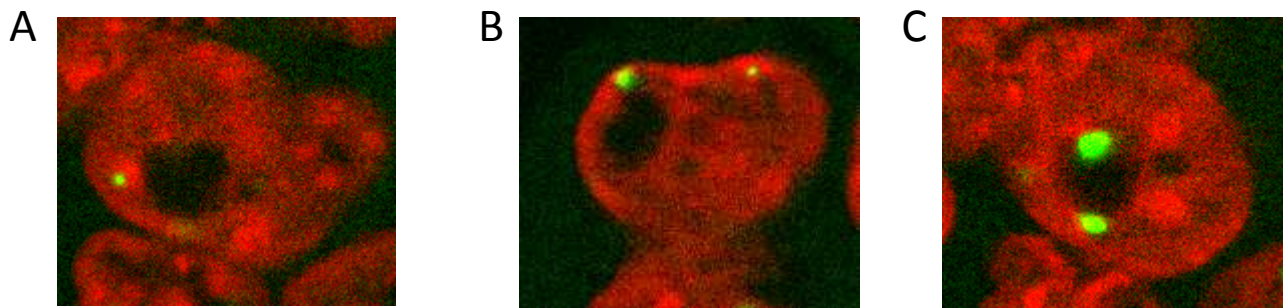

**Supplementary Fig.2**

RNA-FISH for Major satellites in ESCs: examples of nuclei showing localization of RNA foci near chromocenter (A), within peri-nuclear heterochromatin (B) or peri-nucleolar heterochromatin (C).

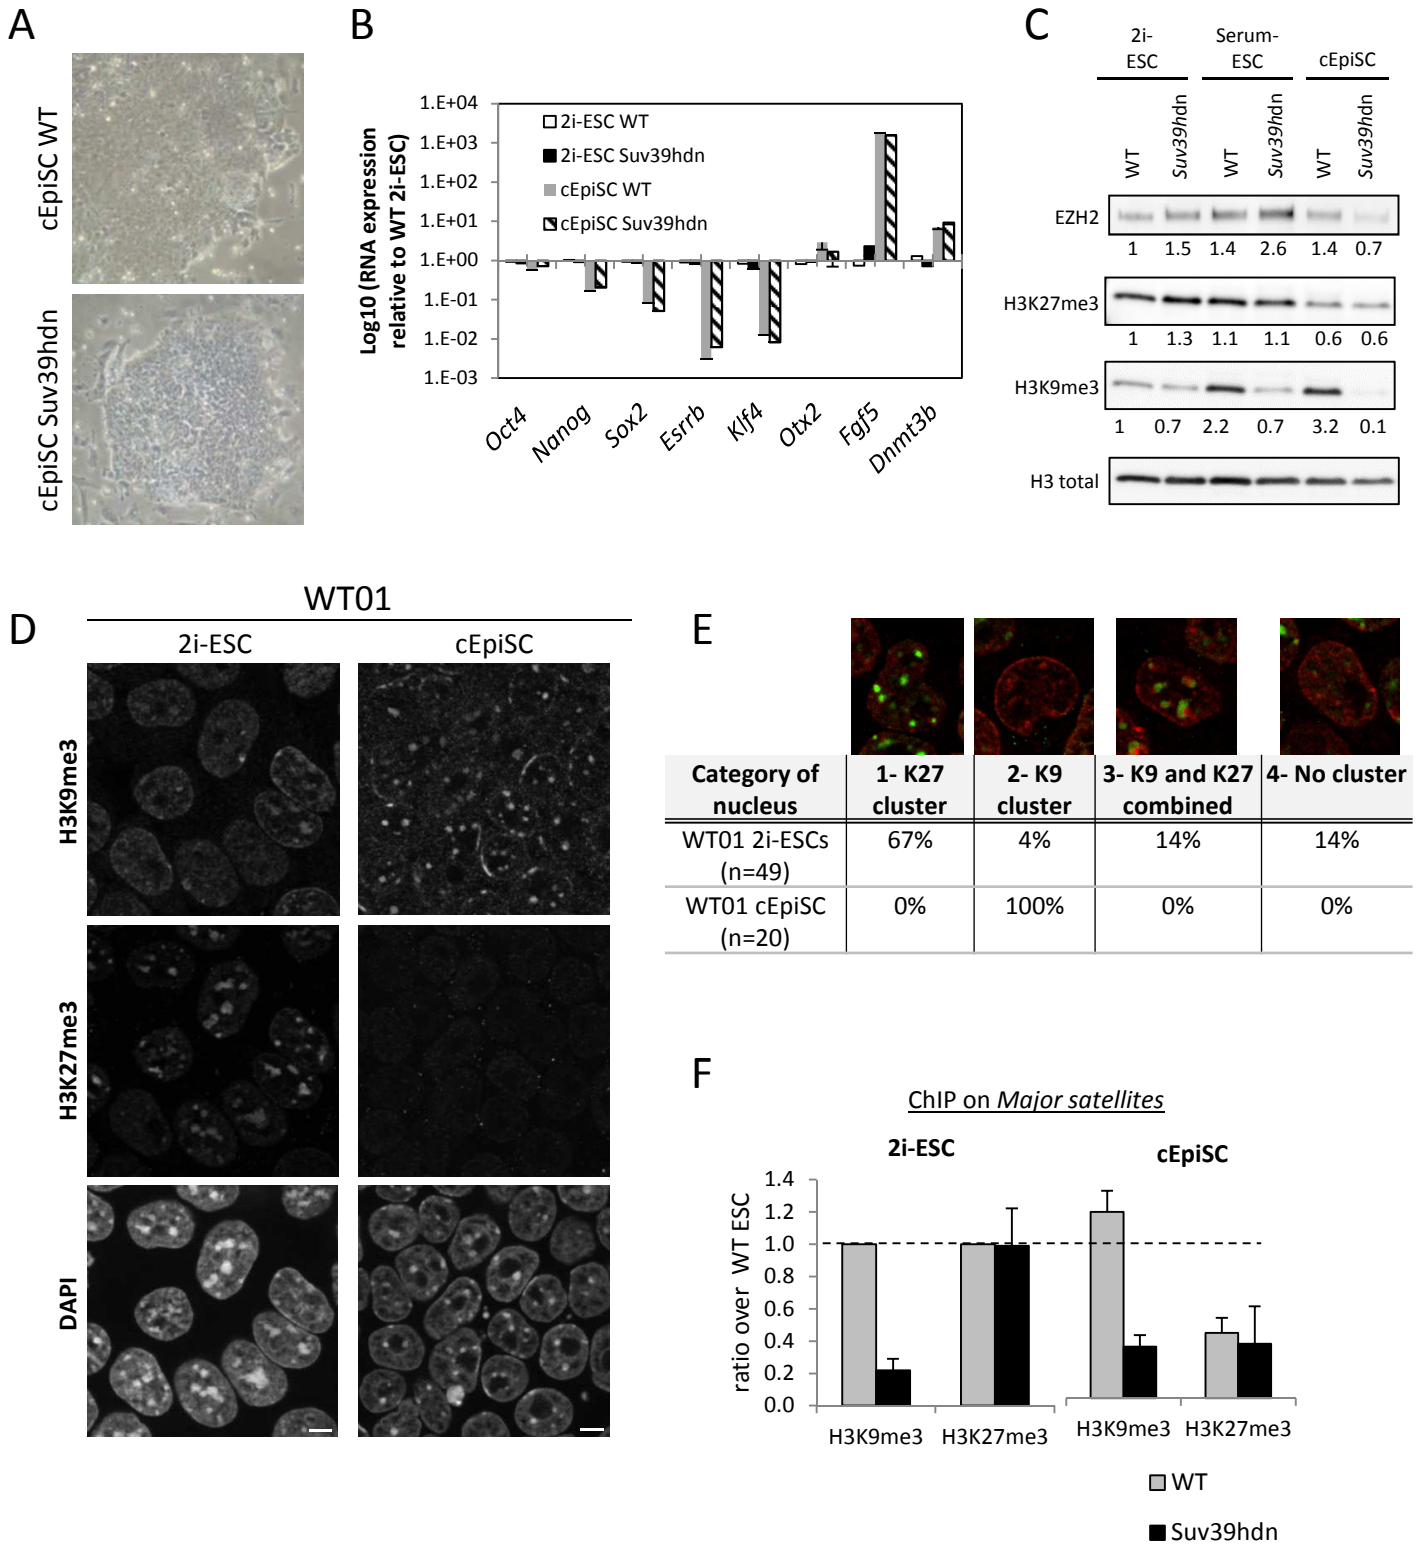

Supp Figure 3

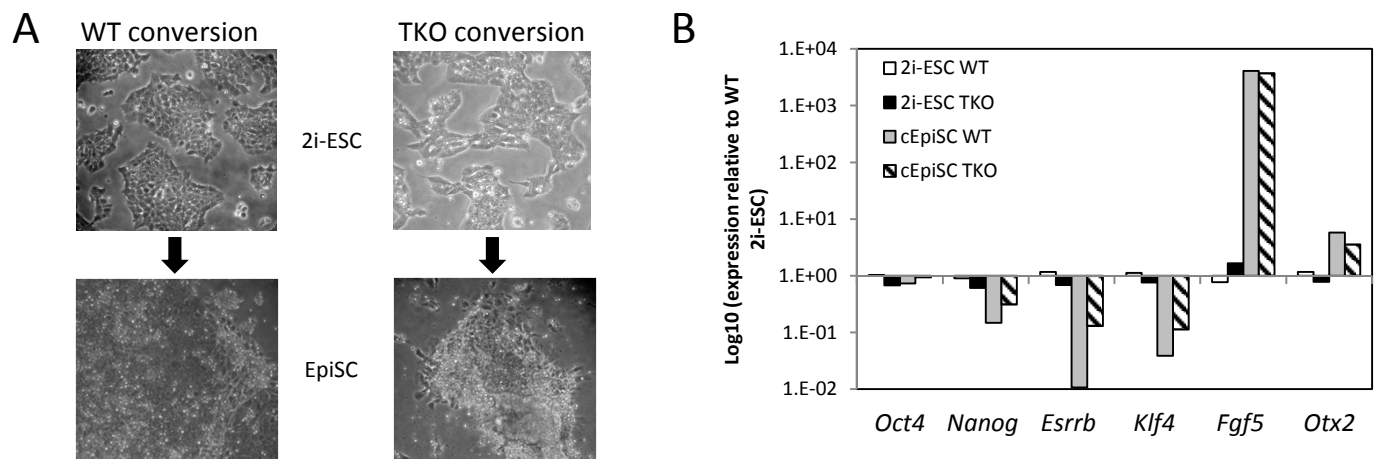

**C**

| Category of nucleus   | 1- K27 cluster | 2- K9 cluster | 3- K9 and K27 combined | 4- No cluster |
|-----------------------|----------------|---------------|------------------------|---------------|
| 159-WT 2i-ESCs (n=30) | 40%            | 21%           | 40%                    | 0%            |
| 159-WT EpiSC (n=17)   | 0%             | 100%          | 0%                     | 0%            |

**Supp Figure 4**

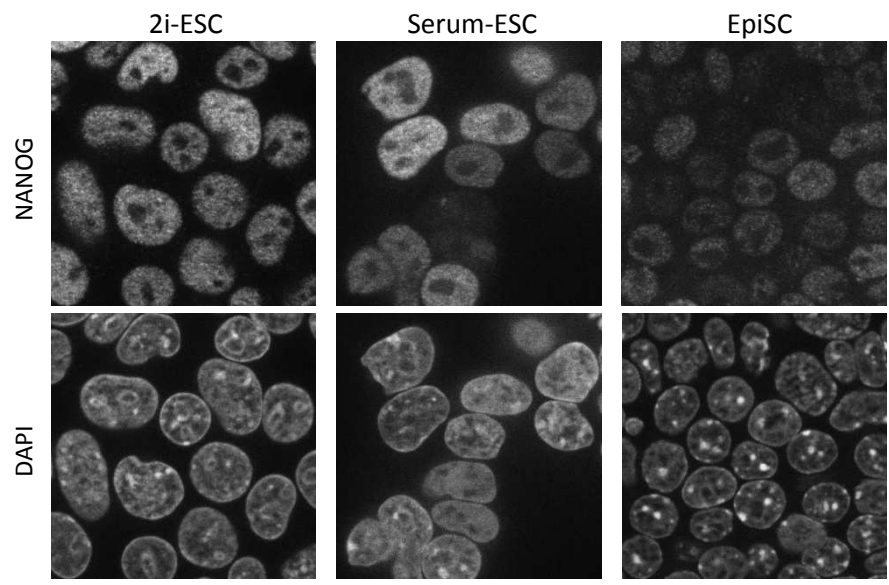

**Supp Figure 5**



| <b>Antigen</b>  | <b>dilution for immunostaining</b> | <b>dilution for western-blot</b> | <b>reference</b>           |
|-----------------|------------------------------------|----------------------------------|----------------------------|
| H3K9me3         | 1/300                              | 1/1000                           | Active Motif 39161         |
| H3K27me2me3     | 1/300                              | 1/1000                           | Active Motif 39538         |
| H3K27me3        |                                    | 1/1000                           | Millipore DAM07-774        |
| EZH2            | 1/200                              | 1/1000                           | Novocastra NCL-L-EZH       |
| EZH1            |                                    | 1/500                            | Active Motif 61583         |
| SUV39H1         | 1/100                              | 1/1000                           | Cell Signaling D11B6 #8729 |
| NANOG           | 1/100                              |                                  | Abcam ab80892              |
| DNMT3B          | 1/200                              | 1/500                            | Active Motif 39207         |
| DNMT3A          |                                    | 1/500                            | Active Motif 39206         |
| H3total         |                                    | 1/20,000                         | Abcam 1791                 |
| Anti-Rabbit-Cy3 | 1/200                              |                                  | Jackson ImmunoResearch     |
| Anti-Mouse-FITC | 1/200                              |                                  | Jackson ImmunoResearch     |
| Anti-Goat-Cy3   | 1/200                              |                                  | Jackson ImmunoResearch     |
| Anti-mouse-HPO  |                                    | 1/5000                           | Jackson ImmunoResearch     |
| anti-rabbit-HPO |                                    | 1/5000                           | Jackson ImmunoResearch     |

**Supp Table S1**

| Primers for qRT-PCR     |                                 |                                |                             |           |
|-------------------------|---------------------------------|--------------------------------|-----------------------------|-----------|
| Gene                    | Primer Forward Sequence (5'-3') | Primer Revers Sequence (5'-3') | Reference or Primer Bank ID | Annealing |
| <i>Major satellite</i>  | GACGACTTGAAAAATGACGAAATC        | CATATTCAGGTCCTTCAGTGTGC        | 1                           | 60°C      |
| <i>Minor satellite</i>  | GAACATATTAGATGAGTGAGTTAC        | GTTCTACAAATCCCCTTCCAAC         | 2                           | 60°C      |
| <i>b-Actin promoter</i> | CGTATTAGGTCCATCTTG              | GCCATTGAGGCGTGATC              |                             | 60°C      |
| <i>Sdha</i>             | GGAACACTCCAAAAACAGACCT          | CCACCCTGGGTATTGAGTAGAA         |                             | 60°C      |
| <i>Pbgd</i>             | CCTGGCATACAGTTTGAAATCAT         | TTTTCCAGGGCGTTTTCT             | 3                           | 60°C      |
| <i>Ezh2</i>             | AGTGACTTGGATTTCCAGCAC           | AATTCTGTTGTAAGGGCGACC          |                             | 60°C      |
| <i>Suv39h1</i>          | GCAGTGTGTGCTGTAATCTTCT          | ATACCCACGCCACTTAACCAG          |                             | 60°C      |
| <i>Dnmt3a</i>           | GAGGGAAGTGAAGCCAC               | CTGGAAGGTGAGTCTGGCA            | 6681209a1                   | 60°C      |
| <i>Dnmt3b</i>           | TCAGATGAGCAAGTCAAGG             | TGTACCAAGCAAGGGGAAG            |                             | 60°C      |
| <i>Oct4</i>             | CAGCCAGACCACCATCTGTC            | GTCTCCGATTTGCATATC             | 7305399a3                   | 58°C      |
| <i>Nanog</i>            | CTTTCACCTATTAAGGTGCTTGC         | TGGCATCGGTTTCATCATGGTAC        | 4                           | 58°C      |
| <i>Sox2</i>             | GCGGAGTGGAACTTTGTCC             | CGGGAAGCGTGTACTTATCCTT         |                             | 60°C      |
| <i>Fgf5</i>             | TGTGTCTCAGGGGATTGTAGG           | AGCTGTTTTCTGGAATCTCTCC         | 6753854a1                   | 60 °C     |
| <i>Otx2</i>             | TATCTAAAGCAACCGCTTACG           | GCCCTAGTAAATGTCGCTCTCTC        | 158518427c1                 | 60°C      |
| <i>Esrrb</i>            | ATGCGAGTACATGCTTAACGC           | CATCCCCACTTTGAGGCATTT          |                             | 60°C      |
| <i>Klf4</i>             | GCAATCACAAAGTCCCTCTC            | GACCTCTTCCCCTCTTTGG            | 5                           | 58°C      |

1. Lehnertz, B. et al. Suv39h-mediated histone H3 lysine 9 methylation directs DNA methylation to major satellite repeats at pericentric heterochromatin. *Curr. Biol.* 13, 1192–1200 (2003).
2. Ferri, F., Bouzinba-Segard, H., Velasco, G., Hubé, F. & Francastel, C. Non-coding murine centromeric transcripts associate with and potentiate Aurora B kinase. *Nucleic Acids Res.* 37, 5071–5080 (2009).
3. Bernardo, A. S. et al. BRACHYURY and CDX2 Mediate BMP-Induced Differentiation of Human and Mouse Pluripotent Stem Cells into Embryonic and Extraembryonic Lineages. *Cell Stem Cell* 9, 144–155 (2011).
4. Hayashi, K. & Surani, M. A. Self-renewing epiblast stem cells exhibit continual delineation of germ cells with epigenetic reprogramming in vitro. *Development* 136, 3549–3556 (2009).
5. Jouneau, A. et al. Naive and primed murine pluripotent stem cells have distinct miRNA expression profiles. *RNA* 18, 253–64 (2012).

## Supp Table S2
